# Supplementary material for: Mechanistic insights into the allylic oxidation of aliphatic compounds by tetraamido iron(v) species: A C–H vs. O–H bond activation
Source: Royal Society of Chemistry journal article supplement (doi:10.1039/d0nj03095c), 2020-01-01
Supplement: d0nj03095c1.pdf [file d0nj03095c1.pdf]

**Mechanistic Insights of Allylic Oxidation of Aliphatic Compound by Tetraamido  
Iron(V) Species: A C-H vs O-H Bond Activation**

**Monika and Azaj Ansari\***

*Department of Chemistry, Central University of Haryana, Mahendergarh 123031, India.*

*Email: [ajaz.alam2@gmail.com](mailto:ajaz.alam2@gmail.com)*

Table S1. B3LYP-D2/B3LYP/wB97XD computed relative energies of *Pathway a* and *Pathway b*.

|                                               | Pathway a |        |         | Pathway b                                     |          |         |         |
|-----------------------------------------------|-----------|--------|---------|-----------------------------------------------|----------|---------|---------|
|                                               | B3LYP-D2  | B3LYP  | wB97XD  |                                               | B3LYP-D2 | B3LYP   | wB97XD  |
| <sup>4</sup> I                                | 5.2       | 5.5    | 24.9    | <sup>4</sup> I                                | 5.2      | 5.5     | 24.9    |
| <sup>2</sup> I                                | 0         | 0      | 0       | <sup>2</sup> I                                | 0        | 0       | 0       |
| <sup>4</sup> ts <sub>a</sub> -1               | 71.5      | 85.8   | 158.5   | <sup>4</sup> ts <sub>b</sub> -1               | 84.5     | 108.4   | 137.4   |
| <sup>2</sup> ts <sub>a</sub> -1               | 64.9      | 85.0   | 120.8   | <sup>2</sup> ts <sub>b</sub> -1               | 60.7     | 125.7   | 102.9   |
| <sup>6</sup> Int <sub>a</sub>                 | 55.0      | 54.3   | 47.1    | <sup>6</sup> Int                              | -49.6    | -53.3   | -60.1   |
| <sup>4</sup> Int <sub>a</sub>                 | 30.9      | 30.9   | 55.2    | <sup>4</sup> Int                              | -73.7    | -76.6   | -51.9   |
| <sup>2</sup> Int <sub>a</sub>                 | 112.9     | 114.6  | 112.1   | <sup>2</sup> Int                              | 8.3      | 6.96    | 4.8     |
| <sup>6</sup> ts <sub>a</sub> -2 <sub>hs</sub> | 82.0      | 103.5  | 124.4   | <sup>6</sup> ts <sub>b</sub> -2 <sub>hs</sub> | -73.6    | -14.5   | 12.5    |
| <sup>4</sup> ts <sub>a</sub> -2 <sub>hs</sub> | 53.7      | 82.6   | 59.6    | <sup>4</sup> ts <sub>b</sub> -2 <sub>hs</sub> | -        | -       | -       |
| <sup>4</sup> ts <sub>a</sub> -2 <sub>is</sub> | 55.6      | 79.1   | 83.1    | <sup>4</sup> ts <sub>b</sub> -2 <sub>is</sub> | -        | -70.3   | -59.9   |
| <sup>2</sup> ts <sub>a</sub> -2 <sub>is</sub> | 68.8      | 66.0   | 43.2    | <sup>2</sup> ts <sub>b</sub> -2 <sub>is</sub> | -39.1    | -38.0   | -       |
| <sup>2</sup> ts <sub>a</sub> -2 <sub>ls</sub> | 64.2      | 84.9   | 96.2    | <sup>2</sup> ts <sub>b</sub> -2 <sub>ls</sub> | -        | -3.8    | -       |
| <sup>6</sup> P                                | -196.4    | -101.3 | -228.36 | <sup>6</sup> P                                | -196.44  | -101.32 | -228.36 |
| <sup>4</sup> P                                | -285.3    | -305.7 | -316.12 | <sup>4</sup> P                                | -285.32  | -305.79 | -316.12 |
| <sup>2</sup> P                                | -285.6    | -224.9 | -221.78 | <sup>2</sup> P                                | -285.69  | -224.91 | -221.78 |

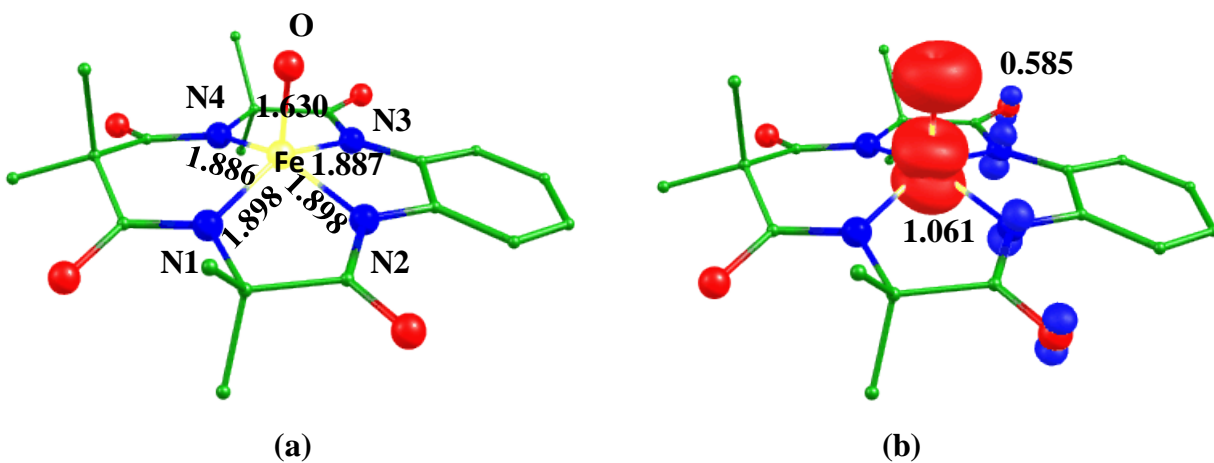

Fig. S1. B3LYP-D2 a) optimized structure (bond lengths in Å) of low spin and its b) spin density plot

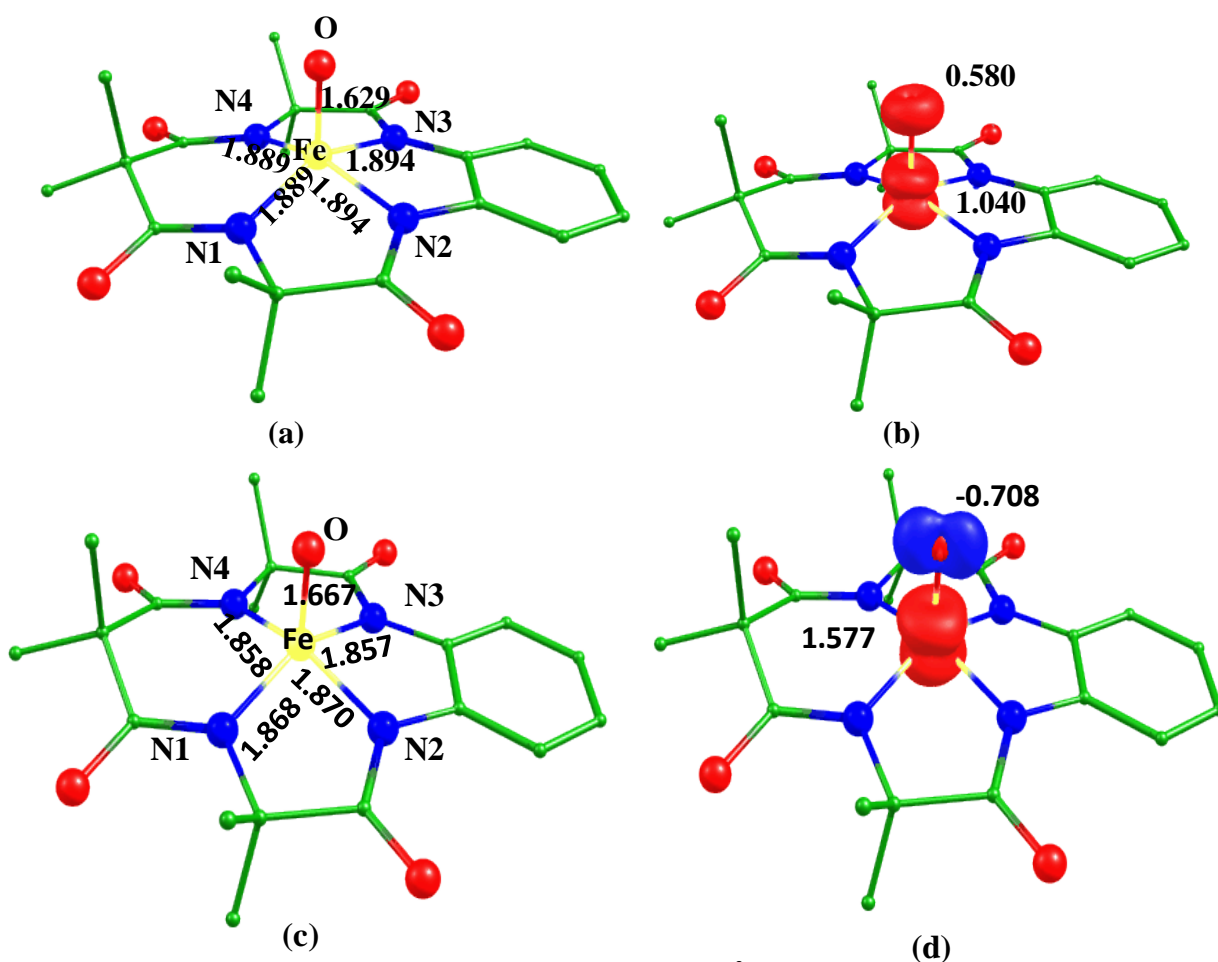

Fig. S2. a) B3LYP optimized structure (bond lengths in Å) of low spin and its b) spin density plot, c) wB97XD optimized structure of low spin and its d) spin density plot.

Table S2. B3LYP-D2 computed structural parameters of the  $[\text{Fe}^{\text{V}}(\text{TAML})\text{O}]^-$  species, intermediates transition states and Product of *Pathway a*.

|                                               | Bond lengths (Å) |       |                   |                   |       | Bond angle (°) |       |       |       |       |          |          |          |          |          |          |
|-----------------------------------------------|------------------|-------|-------------------|-------------------|-------|----------------|-------|-------|-------|-------|----------|----------|----------|----------|----------|----------|
|                                               | Fe-N1            | Fe-N2 | Fe-N3             | Fe-N4             | Fe-O1 | O1-H1          | O1-H2 | H1-O2 | H2-C1 | C1-O2 | Fe-O1-H1 | Fe-O1-H2 | O1-H1-O2 | O1-H2-C1 | N1-Fe-N3 | N2-Fe-N4 |
| <sup>4</sup> I                                | 1.914            | 1.914 | 1.878             | 1.878             | 1.664 | -              | -     | -     | -     | -     | -        | -        | -        | -        | 155.7    | 155.8    |
| <sup>2</sup> I                                | 1.898            | 1.898 | 1.887             | 1.886             | 1.630 | -              | -     | -     | -     | -     | -        | -        | -        | -        | 152.2    | 152.1    |
|                                               |                  |       | 1.87 <sup>1</sup> | 1.58 <sup>1</sup> |       |                |       |       |       |       |          |          |          |          |          |          |
| <sup>4</sup> ts <sub>a</sub> -1               | 1.892            | 1.882 | 1.871             | 1.875             | 1.752 | 1.067          | -     | 1.387 |       | 1.423 | 119.0    |          | 169.6    |          | 153.8    | 156.9    |
| <sup>2</sup> ts <sub>a</sub> -1               | 1.894            | 1.897 | 1.874             | 1.872             | 1.737 | 1.077          | -     | 1.397 |       | 1.435 | 109.0    |          | 169.7    |          | 156.9    | 152.0    |
| <sup>6</sup> Int <sub>a</sub>                 | 1.911            | 1.919 | 1.889             | 1.905             | 1.906 | 154.7          | -     | -     | -     | -     | -        | -        | -        | -        | 154.7    | 150.3    |
| <sup>4</sup> Int <sub>a</sub>                 | 1.877            | 1.877 | 1.879             | 1.879             | 1.803 | 0.982          | -     | -     | -     | -     | -        | -        | -        | -        | 155.0    | 155.0    |
| <sup>2</sup> Int <sub>a</sub>                 | 1.932            | 1.834 | 1.910             | 1.830             | 1.760 | 161.5          | -     | -     | -     | -     | -        | -        | -        | -        | 161.5    | 143.6    |
| <sup>6</sup> ts <sub>a</sub> -hs              | 1.884            | 1.912 | 1.875             | 1.877             | 2.010 | -              | 1.297 |       | 1.327 | -     | -        | 115.9    | -        | 173.8    | 160.4    | 153.1    |
| <sup>4</sup> ts <sub>a</sub> -hs              | 1.901            | 1.904 | 1.887             | 1.881             | 1.974 | -              | 1.470 |       | 1.226 | -     | -        | 129.7    | -        | 170.7    | 155.6    | 155.9    |
| <sup>4</sup> ts <sub>a</sub> -2 <sub>is</sub> | 1.887            | 1.898 | 1.883             | 1.890             | 1.886 | -              | 1.598 |       | 1.174 | -     | -        | 130.5    | -        | 166.7    | 156.2    | 153.9    |
| <sup>2</sup> ts <sub>a</sub> -2 <sub>is</sub> | 1.903            | 1.911 | 1.883             | 1.889             | 1.956 | -              | 1.276 |       | 1.335 | -     | -        | 132.8    | -        | 174.9    | 156.9    | 155.1    |
| <sup>2</sup> ts <sub>a</sub> -2 <sub>ls</sub> | 1.877            | 1.878 | 1.880             | 1.870             | 1.848 | -              | 1.457 |       | 1.224 | -     | -        | 131.8    | -        | 173.3    | 160.2    | 155.7    |
| <sup>6</sup> P                                | 1.984            | 1.984 | 1.924             | 1.924             | -     | -              | -     | -     | -     | -     | -        | -        | -        | -        | 159.7    | 159.7    |
| <sup>4</sup> P                                | 1.864            | 1.867 | 1.868             | 1.864             | -     | -              | -     | -     | -     | -     | -        | -        | -        | -        | 171.9    | 171.9    |
| <sup>2</sup> P                                | 1.851            | 1.872 | 1.853             | 1.865             | -     | -              | -     | -     | -     | -     | -        | -        | -        | -        | 170.9    | 171.2    |

Table S3. B3LYP computed structural parameters of the [Fe<sup>V</sup>(TAML)O]<sup>-</sup> species, intermediates, transition states and Product of *Pathway a*.

|                                               | Bond lengths (Å) |       |       |       |       |       |       |       |       |       | Bond angle (°) |          |          |          |          |          |
|-----------------------------------------------|------------------|-------|-------|-------|-------|-------|-------|-------|-------|-------|----------------|----------|----------|----------|----------|----------|
|                                               | Fe-N1            | Fe-N2 | Fe-N3 | Fe-N4 | Fe-O1 | O1-H1 | O1-H2 | H1-O2 | H2-C1 | C1-O2 | Fe-O1-H1       | Fe-O1-H2 | O1-H1-O2 | O1-H2-C1 | N1-Fe-N3 | N2-Fe-N4 |
| <sup>4</sup> I                                | 1.880            | 1.880 | 1.910 | 1.910 | 1.665 | -     | -     | -     | -     | -     | -              | -        | -        | -        | 156.1    | 156.1    |
| <sup>2</sup> I                                | 1.889            | 1.889 | 1.894 | 1.894 | 1.629 | -     | -     | -     | -     | -     | -              | -        | -        | -        | 152.3    | 152.3    |
| <sup>4</sup> ts <sub>a</sub> -1               | 1.897            | 1.902 | 1.878 | 1.878 | 1.720 | 1.142 | -     | 1.289 | -     | 1.443 | 117.2          | -        | 174.2    | -        | 154.2    | 154.4    |
| <sup>2</sup> ts <sub>a</sub> -1               | 1.872            | 1.897 | 1.895 | 1.881 | 1.725 | 1.116 | -     | 1.326 | -     | 1.430 | 111.4          | -        | 171.9    | -        | 156.0    | 152.4    |
| <sup>6</sup> Int <sub>a</sub>                 | 1.892            | 1.908 | 1.910 | 1.918 | 1.910 | 0.979 | -     | -     | -     | -     | -              | -        | -        | -        | 154.4    | 150.3    |
| <sup>4</sup> Int <sub>a</sub>                 | 1.881            | 1.881 | 1.879 | 1.879 | 1.806 | 0.981 | -     | -     | -     | -     | -              | -        | -        | -        | 154.7    | 154.7    |
| <sup>2</sup> Int <sub>a</sub>                 |                  |       |       |       |       |       | -     | -     | -     | -     | -              | -        | -        | -        |          |          |
| <sup>6</sup> ts <sub>a</sub> -hs              | 1.920            | 1.882 | 1.887 | 1.890 | 2.020 | -     | 1.277 | -     | 1.358 | -     | -              | 126.6    | -        | 174.6    | 158.9    | 151.5    |
| <sup>4</sup> ts <sub>a</sub> -hs              | 1.887            | 1.901 | 1.904 | 1.890 | 1.994 | -     | 1.471 | -     | 1.238 | -     | -              | 141.3    | -        | 175.7    | 154.4    | 155.5    |
| <sup>4</sup> ts <sub>a</sub> -2 <sub>is</sub> | 1.889            | 1.895 | 1.885 | 1.898 | 1.911 | -     | 1.549 | -     | 1.200 | -     | -              | 141.4    | -        | 172.6    | 156.3    | 152.7    |
| <sup>2</sup> ts <sub>a</sub> -2 <sub>is</sub> | 1.891            | 1.892 | 1.908 | 1.909 | 1.966 | -     | 1.307 | -     | 1.327 | -     | -              | 140.7    | -        | 175.0    | 155.3    | 154.8    |
| <sup>2</sup> ts <sub>a</sub> -2 <sub>ls</sub> | 1.874            | 1.877 | 1.886 | 1.876 | 1.867 | -     | 1.432 | -     | 1.248 | -     | -              | 141.7    | -        | 173.2    | 159.8    | 154.1    |
| <sup>6</sup> P                                | 1.978            | 1.978 | 1.909 | 1.909 | -     | -     | -     | -     | -     | -     | -              | -        | -        | -        | 166.6    | 166.6    |
| <sup>4</sup> P                                | 1.863            | 1.863 | 1.870 | 1.870 | -     | -     | -     | -     | -     | -     | -              | -        | -        | -        | 172.0    | 172.0    |
| <sup>2</sup> P                                | 1.858            | 1.870 | 1.852 | 1.861 | -     | -     | -     | -     | -     | -     | -              | -        | -        | -        | 171.3    | 171.3    |

Table S4. WB97XD computed structural parameters of the [Fe<sup>V</sup>(TAML)O]<sup>-</sup> species, intermediates, transition states and Product of *Pathway a*.

|                                               | Bond lengths (Å) |       |       |       |       |       |       |       |       |       | Bond angle (°) |          |          |          |          |          |
|-----------------------------------------------|------------------|-------|-------|-------|-------|-------|-------|-------|-------|-------|----------------|----------|----------|----------|----------|----------|
|                                               | Fe-N1            | Fe-N2 | Fe-N3 | Fe-N4 | Fe-O1 | O1-H1 | O1-H2 | H1-O2 | H2-C1 | C1-O2 | Fe-O1-H1       | Fe-O1-H2 | O1-H1-O2 | O1-H2-C1 | N1-Fe-N3 | N2-Fe-N4 |
| <sup>4</sup> I                                | 1.876            | 1.877 | 1.883 | 1.882 | 1.638 | -     | -     | -     | -     | -     | -              | -        | -        | -        | 153.9    | 153.9    |
| <sup>2</sup> I                                | 1.868            | 1.870 | 1.857 | 1.858 | 1.667 | -     | -     | -     | -     | -     | -              | -        | -        | -        | 152.9    | 153.2    |
| <sup>4</sup> ts <sub>a</sub> -1               | 1.860            | 1.861 | 1.857 | 1.870 | 1.742 | 1.098 | -     | 1.275 | -     | 1.423 | 118.7          | -        | 167.1    | -        | 159.0    | 153.7    |
| <sup>2</sup> ts <sub>a</sub> -1               | 1.854            | 1.868 | 1.871 | 1.861 | 1.760 | 1.139 | -     | 1.203 | -     | 1.439 | 119.2          | -        | 119.2    | -        | 153.9    | 154.9    |
| <sup>6</sup> Int <sub>a</sub>                 | 1.875            | 1.890 | 1.891 | 1.899 | 1.889 | 0.972 | -     | -     | -     | -     | -              | -        | -        | -        | 154.6    | 150.5    |
| <sup>4</sup> Int <sub>a</sub>                 | 1.867            | 1.865 | 1.859 | 1.859 | 1.784 | 0.975 | -     | -     | -     | -     | -              | -        | -        | -        | 155.5    | 155.5    |
| <sup>2</sup> Int <sub>a</sub>                 | 1.903            | 1.804 | 1.913 | 1.810 | 1.735 | 0.977 | -     | -     | -     | -     | -              | -        | -        | -        | 163.7    | 1.810    |
| <sup>6</sup> ts <sub>a</sub> -hs              | 1.872            | 1.880 | 1.864 | 1.844 | 2.017 | -     | 1.241 | -     | 1.371 | -     | -              | 116.2    | -        | 172.2    | 157.8    | 156.7    |
| <sup>4</sup> ts <sub>a</sub> -hs              | 1.904            | 1.890 | 1.887 | 1.901 | 1.994 | -     | 1.471 | -     | 1.238 | -     | -              | 141.3    | -        | 175.8    | 154.4    | 155.5    |
| <sup>4</sup> ts <sub>a</sub> -2 <sub>is</sub> | 1.885            | 1.893 | 1.902 | 1.877 | 1.942 | -     | 1.417 | -     | 1.245 | -     | -              | 129.3    | -        | 171.2    | 155.5    | 155.5    |
| <sup>2</sup> ts <sub>a</sub> -2 <sub>is</sub> | 1.909            | 1.891 | 1.892 | 1.908 | 1.966 | -     | 1.307 | -     | 1.327 | -     | -              | 140.7    | -        | 175.0    | 155.4    | 154.8    |
| <sup>2</sup> ts <sub>a</sub> -2 <sub>ls</sub> | 1.900            | 1.907 | 1.874 | 1.879 | 1.971 | -     | 1.226 | -     | 1.379 | -     | -              | 130.9    | -        | 172.4    | 156.4    | 154.9    |
| <sup>6</sup> P                                | 1.959            | 1.959 | 1.908 | 1.908 | -     | -     | -     | -     | -     | -     | -              | -        | -        | -        | 162.3    | 162.3    |
| <sup>4</sup> P                                | 1.849            | 1.858 | 1.858 | 1.858 | -     | -     | -     | -     | -     | -     | -              | -        | -        | -        | 172.1    | 172.1    |
| <sup>2</sup> P                                | 1.831            | 1.852 | 1.833 | 1.863 | -     | -     | -     | -     | -     | -     | -              | -        | -        | -        | 172.0    | 172.2    |

Table S5. B3LYP-D2 computed spin density values of the [Fe<sup>V</sup>(TAML)O]<sup>-</sup> species, intermediates, transition states and Product of *Pathway a*.

|                                               | Fe1   | O1    | H1     | H2     | O2     | C1     |
|-----------------------------------------------|-------|-------|--------|--------|--------|--------|
| <sup>4</sup> I                                | 1.279 | 0.757 | -      | -      | -      | -      |
| <sup>2</sup> I                                | 1.061 | 0.585 | -      | -      | -      | -      |
| <sup>4</sup> ts <sub>a</sub> -1               | 1.607 | 0.290 | -0.017 | -      | 0.519  | -      |
| <sup>2</sup> ts <sub>a</sub> -1               | 1.690 | 0.139 | 0.012  | -      | -0.447 | -      |
| <sup>6</sup> Int <sub>a</sub>                 | 3.202 | 0.381 | 0.005  | -      | -      | -      |
| <sup>4</sup> Int <sub>a</sub>                 | 1.788 | 0.036 | 0.010  | -      | -      | -      |
| <sup>2</sup> Int <sub>a</sub>                 | 0     | 0     | 0      | -      | -      | -      |
| <sup>6</sup> ts <sub>a</sub> -2 <sub>hs</sub> | 3.173 | 0.216 | -      | 0.109  | 0.557  | 0.141  |
| <sup>4</sup> ts <sub>a</sub> -2 <sub>hs</sub> | 3.143 | 0.201 | -      | -0.119 | -0.698 | 0.010  |
| <sup>4</sup> ts <sub>a</sub> -2 <sub>is</sub> | 2.319 | 0.038 | -      | 0.110  | 0.795  | -0.031 |
| <sup>2</sup> ts <sub>a</sub> -2 <sub>is</sub> | 2.468 | 0.051 | -      | -0.108 | -0.625 | -0.095 |
| <sup>2</sup> ts <sub>a</sub> -2 <sub>is</sub> | 0.513 | 0.026 | -      | 0.120  | 0.717  | -0.016 |
| <sup>6</sup> P                                | 3.914 | -     | -      | -      | -      | -      |
| <sup>4</sup> P                                | 2.663 | -     | -      | -      | -      | -      |
| <sup>2</sup> P                                | 1.187 | -     | -      | -      | -      | -      |

Table S6. B3LYP computed spin density values of the  $[\text{Fe}^{\text{V}}(\text{TAML})\text{O}]^-$  species, intermediates , transition states and product of *Pathway a*.

|                                      | Fe1    | O1     | H1    | H2     | O2     | C1     |
|--------------------------------------|--------|--------|-------|--------|--------|--------|
| $^4\text{I}$                         | 1.274  | 0.766  | -     | -      | -      | -      |
| $^2\text{I}$                         | 1.040  | 0.580  | -     | -      | -      | -      |
| $^4\text{ts}_a\text{-1}$             | 1.649  | 0.251  | 0.251 | -      | 0.419  | -      |
| $^2\text{ts}_a\text{-1}$             | 1.653  | 0.153  | 0.012 | -      | -0.382 | -      |
| $^6\text{Int}_a$                     | 3.206  | 0.381  | 0.004 | -      | -      | -      |
| $^4\text{Int}_a$                     | 1.804  | 0.037  | 0.009 | -      | -      | -      |
| $^2\text{Int}_a$                     | 0      | 0      | 0     | -      | -      | -      |
| $^6\text{ts}_a\text{-2}_{\text{hs}}$ | 3.217  | 0.195  | -     | 0.195  | 0.583  | 0.151  |
| $^4\text{ts}_a\text{-2}_{\text{hs}}$ | 3.154  | 0.197  | -     | -0.123 | -0.688 | 0.004  |
| $^4\text{ts}_a\text{-2}_{\text{is}}$ | 2.358  | 0.026  | -     | 0.116  | 0.757  | -0.028 |
| $^2\text{ts}_a\text{-2}_{\text{is}}$ | 2.450  | 0.062  | -     | -0.115 | -0.614 | -0.077 |
| $^2\text{ts}_a\text{-2}_{\text{is}}$ | -0.003 | -0.050 | -     | 0.166  | -0.031 | 0.084  |
| $^6\text{P}$                         | 3.921  | -      | -     | -      | -      | -      |
| $^4\text{P}$                         | 2.664  | -      | -     | -      | -      | -      |
| $^2\text{P}$                         | 1.228  | -      | -     | -      | -      | -      |



Table S7. wB97XD computed spin density values of the  $[\text{Fe}^{\text{V}}(\text{TAML})\text{O}]^-$  species and their intermediates and transition states and product of *Pathway a*.

|                                      | Fe1   | O1     | H1     | H2     | O2     | C1     |
|--------------------------------------|-------|--------|--------|--------|--------|--------|
| $^4\text{I}$                         | 2.312 | 0.645  | -      | -      | -      | -      |
| $^2\text{I}$                         | 1.577 | -0.708 | -      | -      | -      | -      |
| $^4\text{ts}_a\text{-1}$             | 1.500 | 0.414  | -0.033 | -      | 0.496  | -      |
| $^2\text{ts}_a\text{-1}$             | 1.866 | -0.433 | 0.052  | -      | -0.531 | -      |
| $^6\text{Int}_a$                     | 3.273 | 0.381  | 0.003  | -      | -      | -      |
| $^4\text{Int}_a$                     | 1.804 | 0.014  | 0.009  | -      | -      | -      |
| $^2\text{Int}_a$                     | 0.805 | -0.601 | 0.393  | -      | -      | -      |
| $^6\text{ts}_a\text{-2}_{\text{hs}}$ | 3.211 | 0.222  | -      | 0.101  | 0.560  | 0.178  |
| $^4\text{ts}_a\text{-2}_{\text{hs}}$ | 3.154 | 0.197  | -      | -0.123 | -0.688 | 0.004  |
| $^4\text{ts}_a\text{-2}_{\text{is}}$ | 2.618 | 0.124  | -      | 0.108  | 0.714  | 0.023  |
| $^2\text{ts}_a\text{-2}_{\text{is}}$ | 2.451 | 0.062  | -      | 0.008  | -0.614 | -0.077 |
| $^2\text{ts}_a\text{-2}_{\text{ls}}$ | 2.628 | 0.067  | -      | -0.109 | -0.584 | -0.137 |
| $^6\text{p}$                         | 3.996 | -      | -      | -      | -      | -      |
| $^4\text{p}$                         | 2.744 | -      | -      | -      | -      | -      |
| $^2\text{p}$                         | 0.990 | -      | -      | -      | -      | -      |

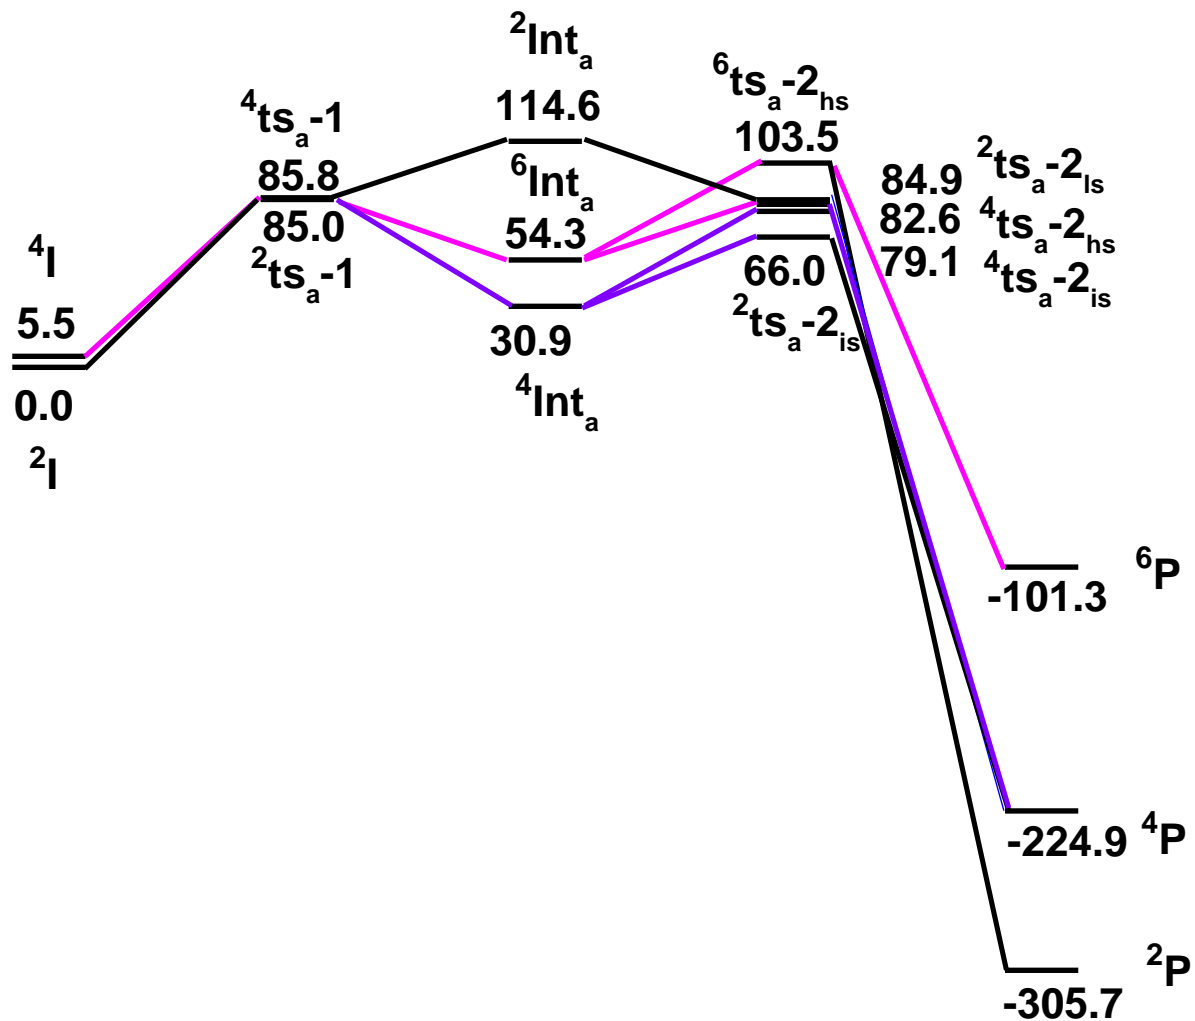

Fig. S3. B3LYP computed energy surface for the formation of cyclohex-2-enone from cyclohex-2-enol *via* O-H bond activation (*pathway a*) by  $Fe^V=O$  species ( $\Delta G$  in  $kJmol^{-1}$ ).

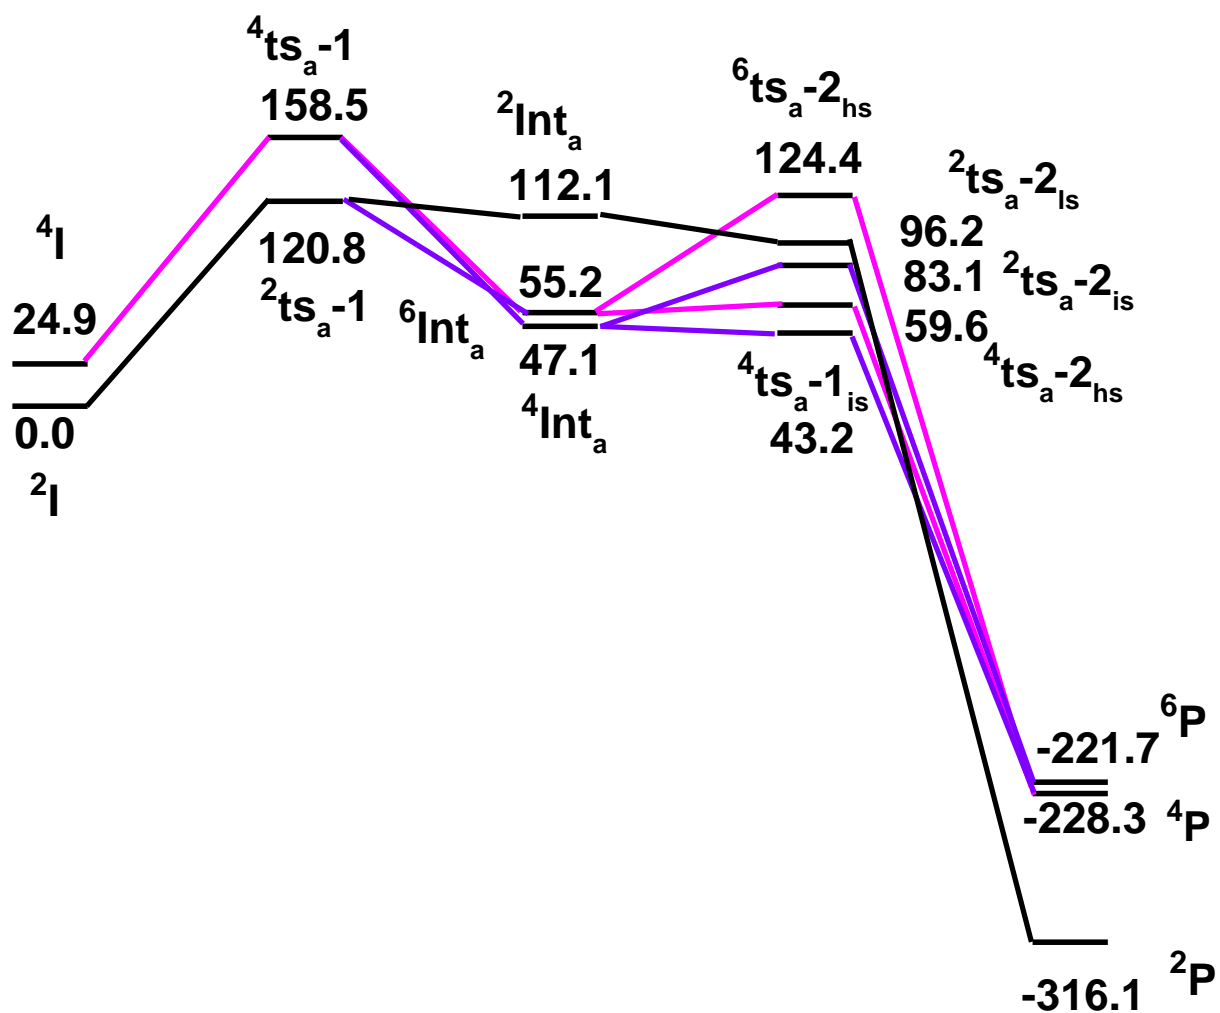

Fig. S4. wB97XD computed energy surface for the formation of cyclohex-2-enone from cyclohex-2-enol *via* O-H bond activation (**pathway a**) by Fe<sup>V</sup>=O species ( $\Delta G$  in kJmol<sup>-1</sup>).

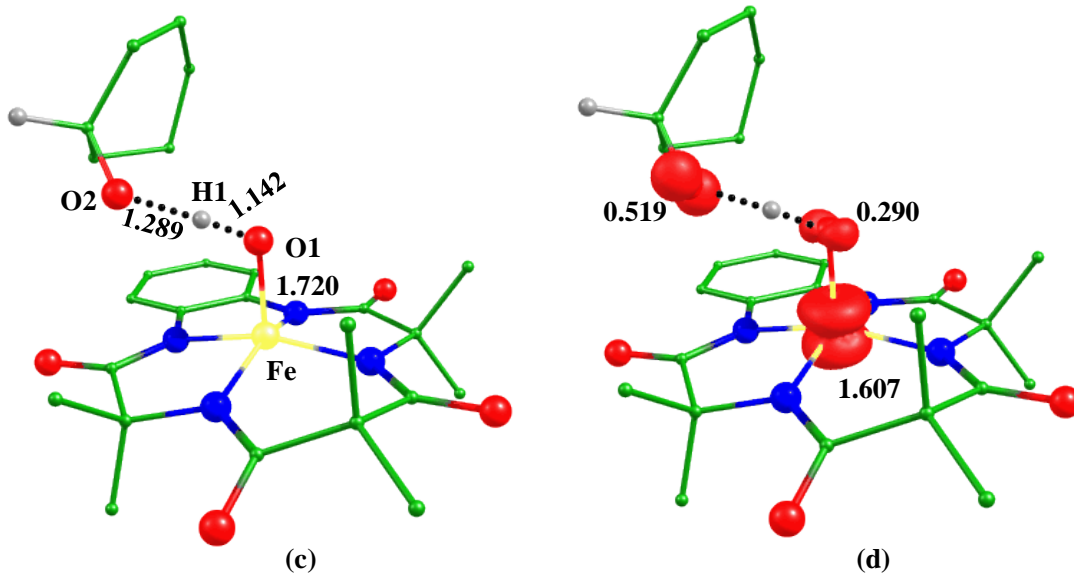

Fig. S5. B3LYP-D2 a) optimized structure (bond length in Å) and b) its spin density plot of the transition state  ${}^4ts_a-1$ .

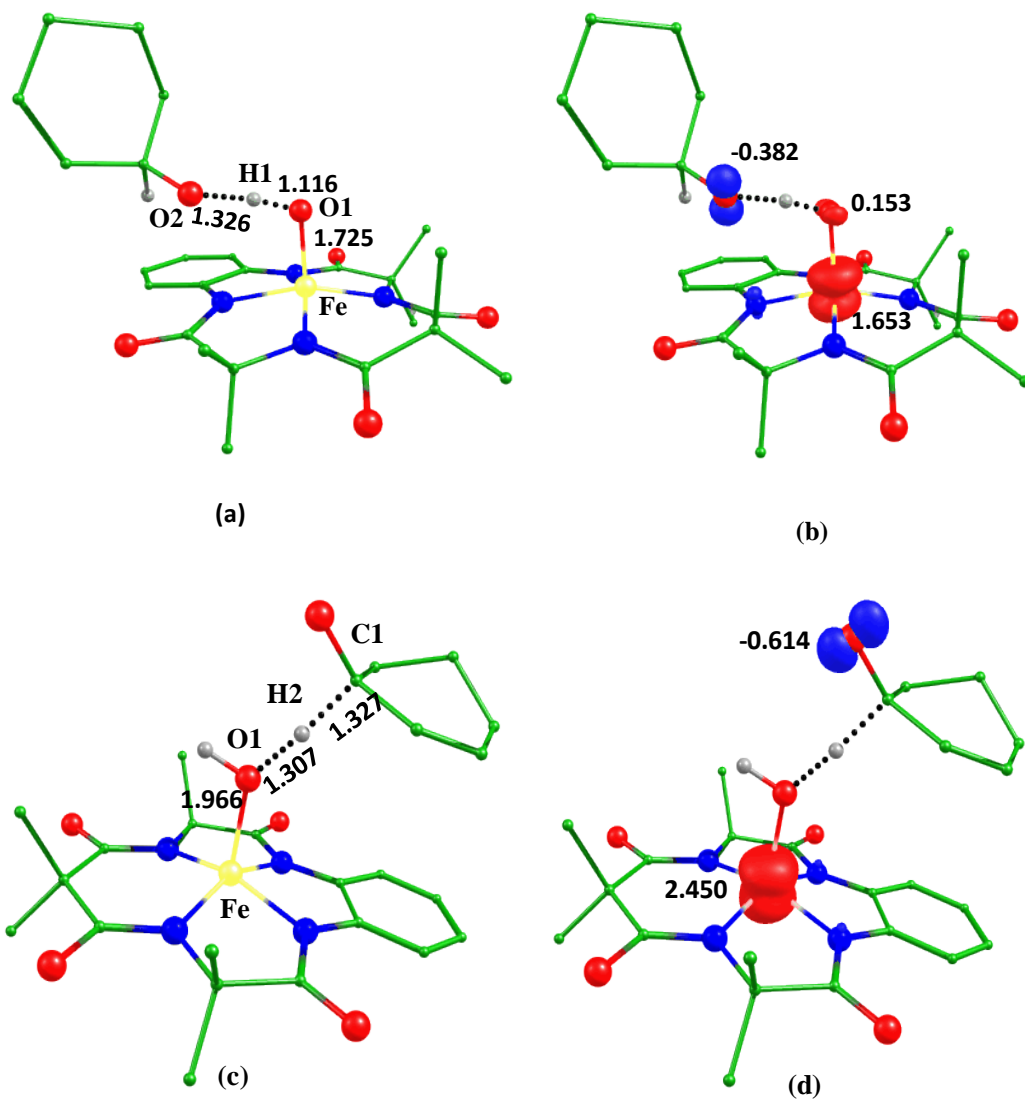

Fig. S6. B3LYP a) optimized structure (bond length in Å) and b) its spin density plot of the transition state  ${}^2\text{ts}_a-1$ , c) optimized structure and d) its spin density plot of the transition state  ${}^2\text{ts}_a-2_{\text{is}}$ .

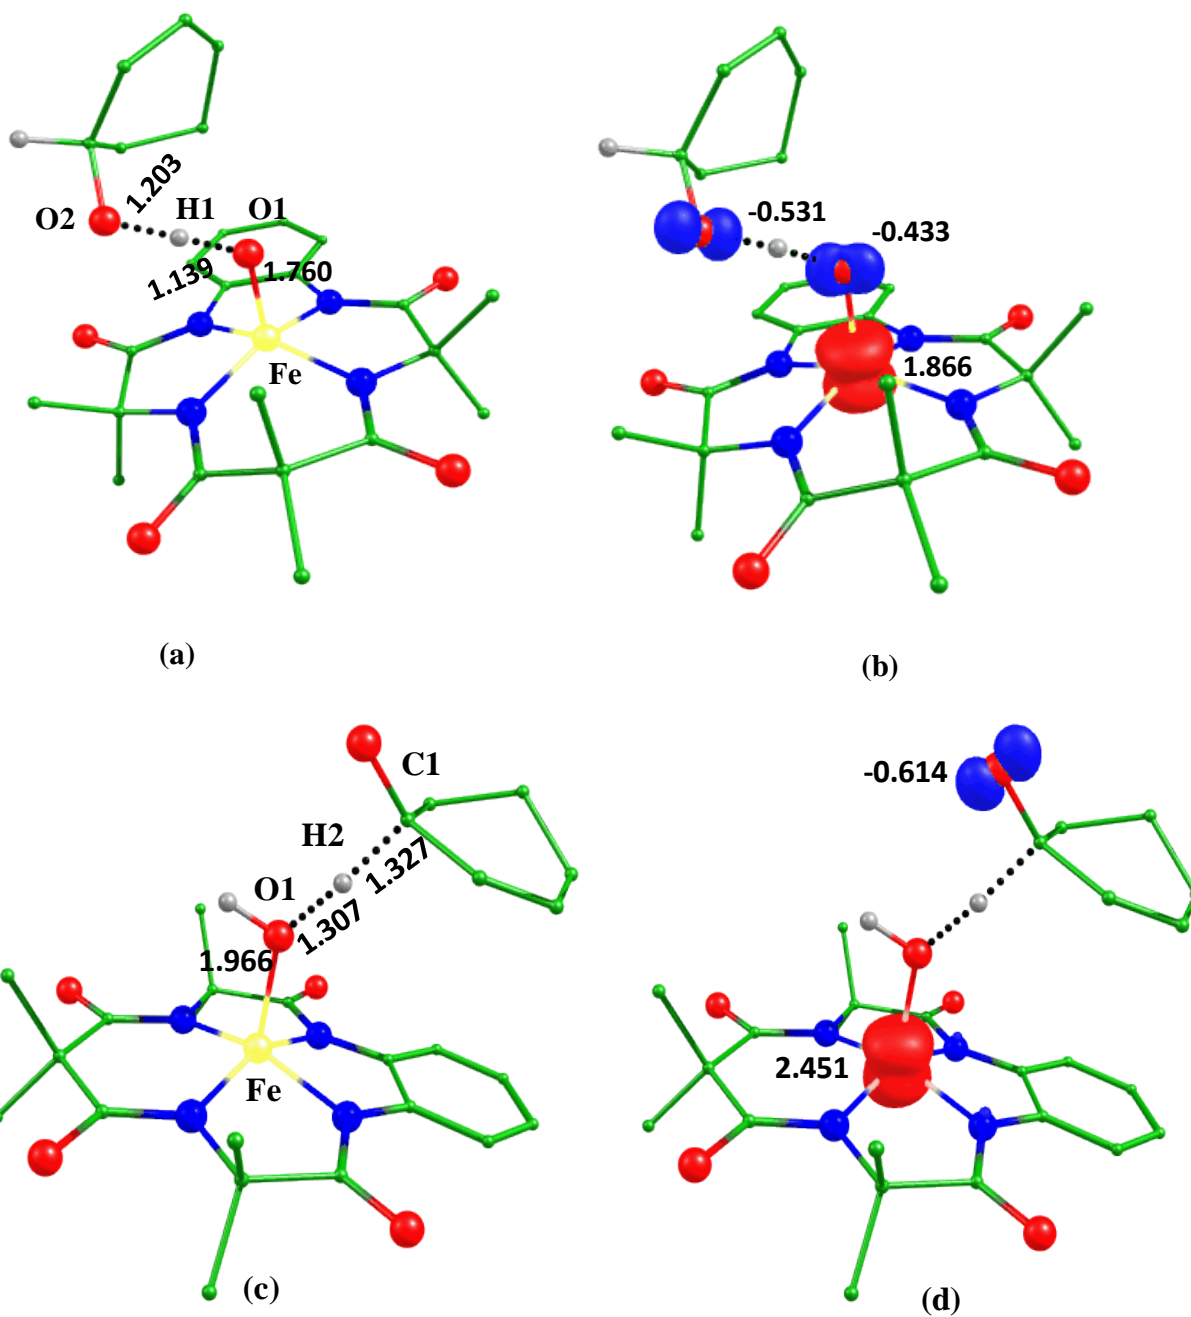

Fig. S7. wB97XD a) optimized structure (bond length in Å) and b) its spin density plot of the transition state  ${}^2t_{s_a-1}$ , c) optimized structure and d) its spin density plot of the transition state  ${}^2t_{s_a-2_{is}}$ .

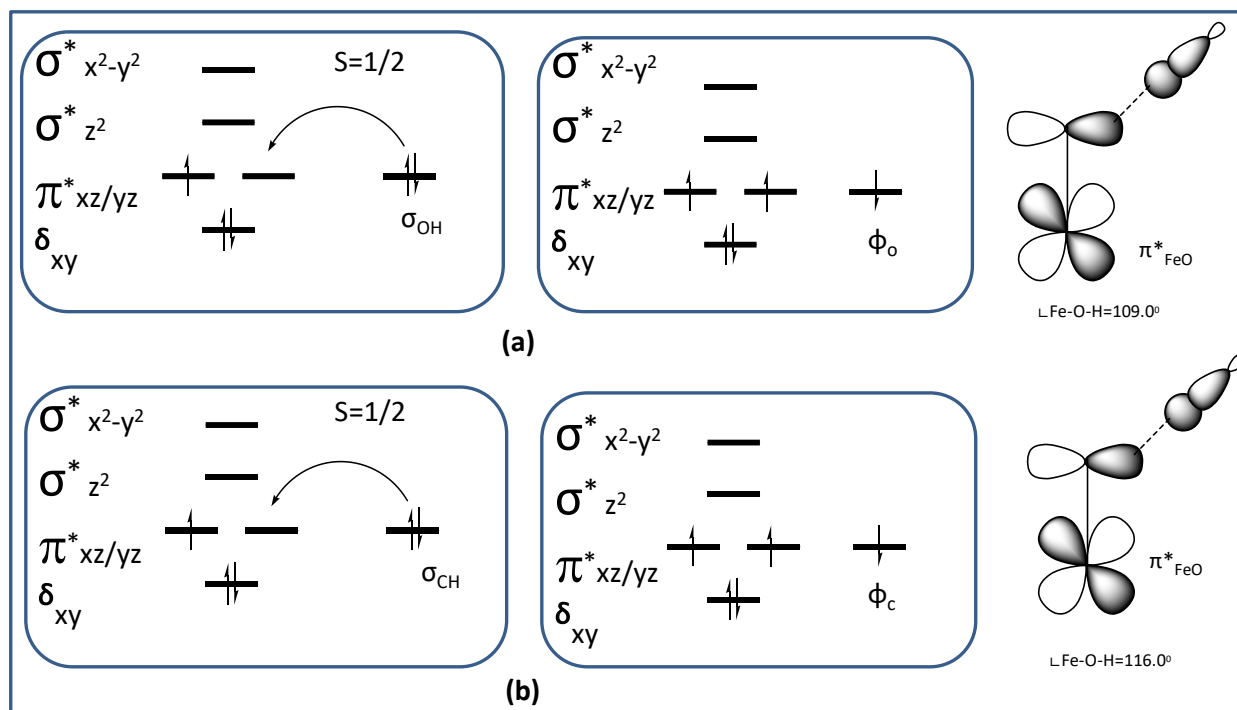

Scheme S1. Orbital occupancy diagrams for the H-abstraction of (a)  ${}^2\text{ts}_a-1$  and (b)  ${}^2\text{ts}_b-1$ .

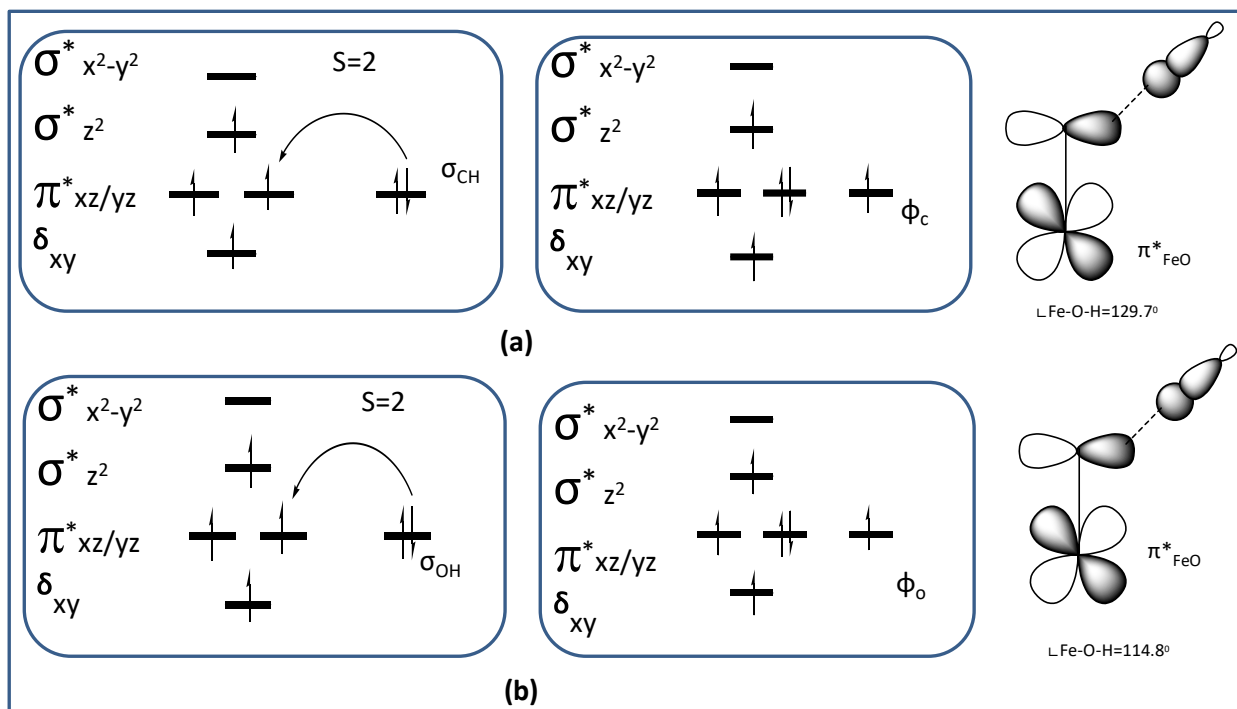

Scheme S2. Orbital occupancy diagrams for the H-abstraction of (a)  ${}^4\text{ts}_a\text{-2}_{\text{hs}}$  and (b)  ${}^6\text{ts}_b\text{-2}_{\text{hs}}$ .



Table S8. B3LYP-D2/B3LYP/wB97XD computed structural parameters of the transition states of *Pathway b*.

|                                  | Bond lengths (Å) |       |       |       |       |       |       |       |       |       | Bond angle (°) |          |          |          |          |          |
|----------------------------------|------------------|-------|-------|-------|-------|-------|-------|-------|-------|-------|----------------|----------|----------|----------|----------|----------|
|                                  | Fe-N1            | Fe-N2 | Fe-N3 | Fe-N4 | Fe-O1 | O1-H1 | O1-H2 | H1-O2 | H2-C1 | C1-O2 | Fe-O1-H2       | Fe-O1-H1 | O1-H2-C1 | O1-H1-O2 | N1-Fe-N3 | N2-Fe-N4 |
| <b>B3LYP-D2</b>                  |                  |       |       |       |       |       |       |       |       |       |                |          |          |          |          |          |
| <sup>4</sup> ts <sub>b-1</sub>   | 1.920            | 1.915 | 1.890 | 1.893 | 1.740 | -     | 1.371 | -     | 1.199 | 1.445 | 134.9          | -        | 174.2    | -        | 152.3    | 153.5    |
| <sup>2</sup> ts <sub>b-1</sub>   | 1.877            | 1.894 | 1.873 | 1.892 | 1.684 | -     | 1.470 | -     | 1.178 | 1.441 | 116.0          | -        | 161.3    | -        | 150.8    | 154.1    |
| <sup>6</sup> ts <sub>b-hs</sub>  | 2.027            | 2.035 | 1.973 | 1.963 | 1.993 | 1.807 | -     | 1.009 | -     | 1.343 | -              | 114.8    | -        | 116.7    | 144.4    | 145.0    |
| <sup>2</sup> ts <sub>b-2is</sub> | 1.876            | 1.879 | 1.891 | 1.879 | 1.844 | 2.220 | -     | 0.983 | -     | 1.377 | -              | 103.5    | -        | 105.6    | 155.8    | 158.4    |
| <b>B3LYP</b>                     |                  |       |       |       |       |       |       |       |       |       |                |          |          |          |          |          |
| <sup>4</sup> ts <sub>b-1</sub>   | 1.910            | 1.901 | 1.904 | 1.914 | 1.777 | -     | 1.266 | -     | 1.257 | 1.444 | 160.3          | -        | 160.3    | -        | 151.6    | 152.2    |
| <sup>2</sup> ts <sub>b-1</sub>   | 1.874            | 1.883 | 1.883 | 1.883 | 1.737 | -     | 1.336 | -     | 1.242 | 1.442 | 117.5          | -        | 152.3    | -        | 153.6    | 153.0    |
| <sup>6</sup> ts <sub>b-hs</sub>  | 2.035            | 1.972 | 1.962 | 1.972 | 1.993 | 1.807 | -     | 1.008 | -     | 1.343 | -              | 114.8    | -        | 116.7    | 145.0    | 144.3    |
| <sup>2</sup> ts <sub>b-is</sub>  | 1.891            | 1.893 | 1.898 | 1.898 | 2.138 | 1.554 | -     | 1.058 | -     | 1.342 | -              | 120.8    | -        | 125.3    | 160.3    | 158.1    |
| <sup>2</sup> ts <sub>b-2is</sub> | 1.879            | 1.891 | 1.878 | 1.876 | 1.843 | 2.220 | -     | 0.982 | -     | 1.377 | -              | 103.5    | -        | 105.5    | 155.7    | 158.4    |
| <sup>2</sup> ts <sub>b-2is</sub> | 1.880            | 1.884 | 1.896 | 1.886 | 1.882 | 2.317 | -     | 0.981 | -     | 1.373 | -              | 109.7    | -        | 99.0     | 158.1    | 154.5    |
| <b>wB97XD</b>                    |                  |       |       |       |       |       |       |       |       |       |                |          |          |          |          |          |
| <sup>4</sup> ts <sub>b-1</sub>   | 1.880            | 1.895 | 1.893 | 1.874 | 1.739 | -     | 1.452 | -     | 1.162 | 1.439 | 134.2          | -        | 174.6    | -        | 152.2    | 154.2    |
| <sup>2</sup> ts <sub>b-1</sub>   | 1.874            | 1.883 | 1.883 | 1.894 | 1.737 | -     | 1.336 | -     | 1.242 | 1.442 | 117.5          | -        | 152.3    | -        | 153.6    | 153.0    |
| <sup>6</sup> ts <sub>b-hs</sub>  | 2.006            | 1.964 | 1.952 | 1.997 | 2.008 | 1.770 | -     | 1.010 | -     | 1.320 | -              | 111.5    | -        | 116.2    | 147.0    | 145.6    |
| <sup>2</sup> ts <sub>b-is</sub>  | 1.876            | 1.885 | 1.886 | 1.879 | 2.124 | 1.511 | -     | 1.066 | -     | 1.329 | -              | 117.6    | -        | 125.7    | 160.3    | 158.7    |

Table S9. B3LYP-D2/B3LYP/wB97XD computed spin density values of the transition states of *Pathway b*.

| B3LYP-D2                                     | Fe    | O1     | H1     | H2    | O2     | C1     |
|----------------------------------------------|-------|--------|--------|-------|--------|--------|
| B3LYP-D2                                     |       |        |        |       |        |        |
| <sup>4</sup> t <sub>b</sub> -1               | 2.853 | 0.267  |        | 0.008 |        | -0.138 |
| <sup>2</sup> t <sub>b</sub> -1               | 1.462 | -0.225 |        | 0.014 |        | -0.157 |
| <sup>6</sup> t <sub>b</sub> -2 <sub>hs</sub> | 3.981 | 0.133  | -0.004 |       | 0.001  | -0.097 |
| <sup>2</sup> t <sub>b</sub> -2 <sub>is</sub> | 1.386 | 0.086  | -0.006 |       | -0.034 | -0.437 |
| B3LYP                                        |       |        |        |       |        |        |
| <sup>4</sup> t <sub>b</sub> -1               | 2.998 | 0.134  |        | 0.026 |        | -0.287 |
| <sup>2</sup> t <sub>b</sub> -1               | 1.668 | -0.374 |        | 0.035 |        | -0.311 |
| <sup>6</sup> t <sub>b</sub> -2 <sub>hs</sub> | 3.980 | 0.133  | -0.004 |       | 0.001  | -0.097 |
| <sup>2</sup> t <sub>b</sub> -2 <sub>is</sub> | 2.672 | 0.059  | -0.000 |       | 0.012  | 0.015  |
| <sup>2</sup> t <sub>b</sub> -2 <sub>is</sub> | 1.386 | 0.086  | -0.006 |       | -0.034 | -0.437 |
| <sup>2</sup> t <sub>b</sub> -2 <sub>is</sub> | 1.277 | 0.105  | -0.004 |       | -0.037 | -0.391 |
| wB97XD                                       |       |        |        |       |        |        |
| <sup>4</sup> t <sub>b</sub> -1               | 3.010 | 0.032  |        | 0.000 |        | -0.177 |
| <sup>2</sup> t <sub>b</sub> -1               | 1.668 | -0.374 |        | 0.035 |        | -0.317 |
| <sup>6</sup> t <sub>b</sub> -2 <sub>hs</sub> | 4.049 | 0.107  | -0.000 |       | 0.004  | -0.000 |
| <sup>2</sup> t <sub>b</sub> -2 <sub>is</sub> | 2.734 | 0.074  | 0.004  |       | 0.006  | 0.004  |

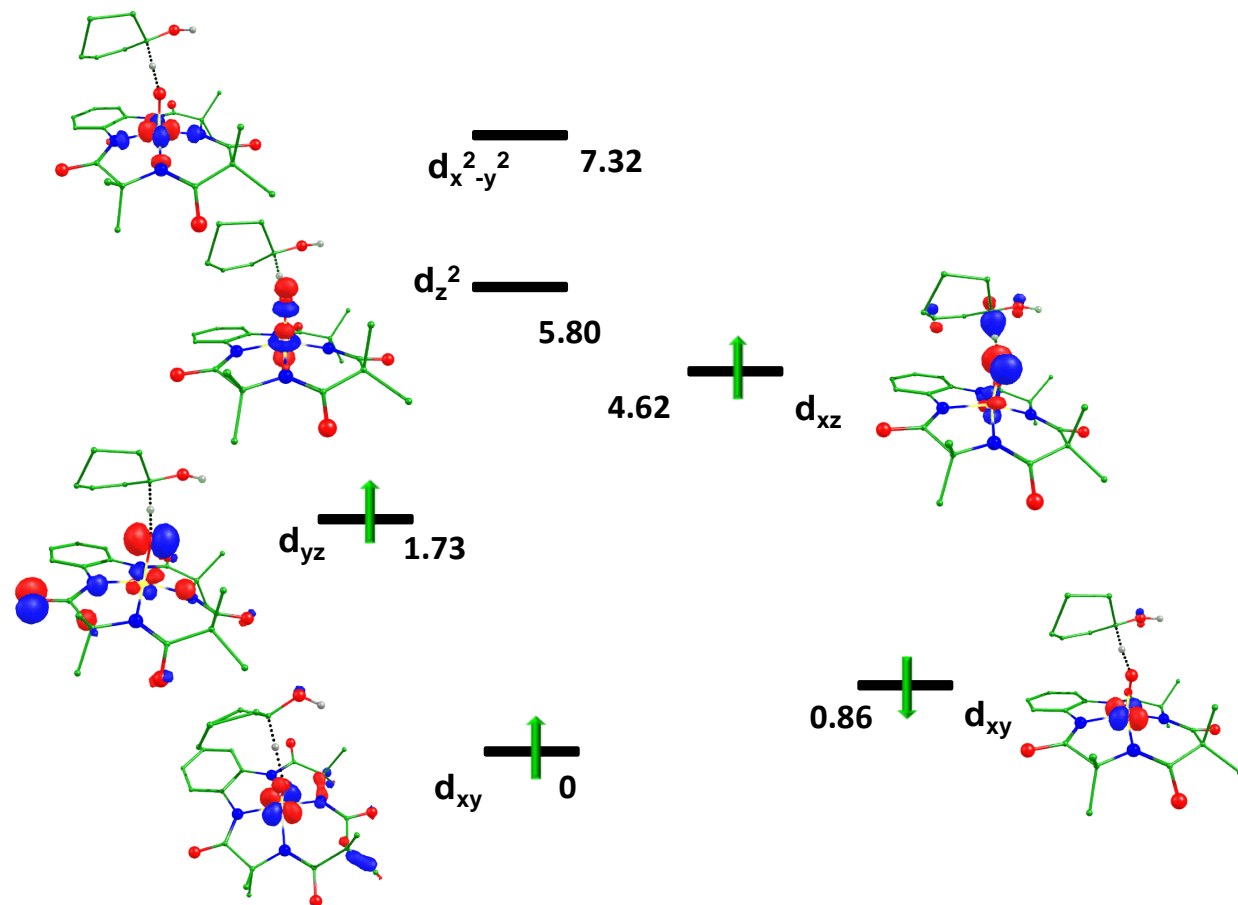

Fig. S8. Computed Eigen-value plot incorporating energies computed for d-based orbitals for alpha and beta spin corresponding to the ground state ( ${}^2t_{s_b-1}$ ) (energies are given in eV).

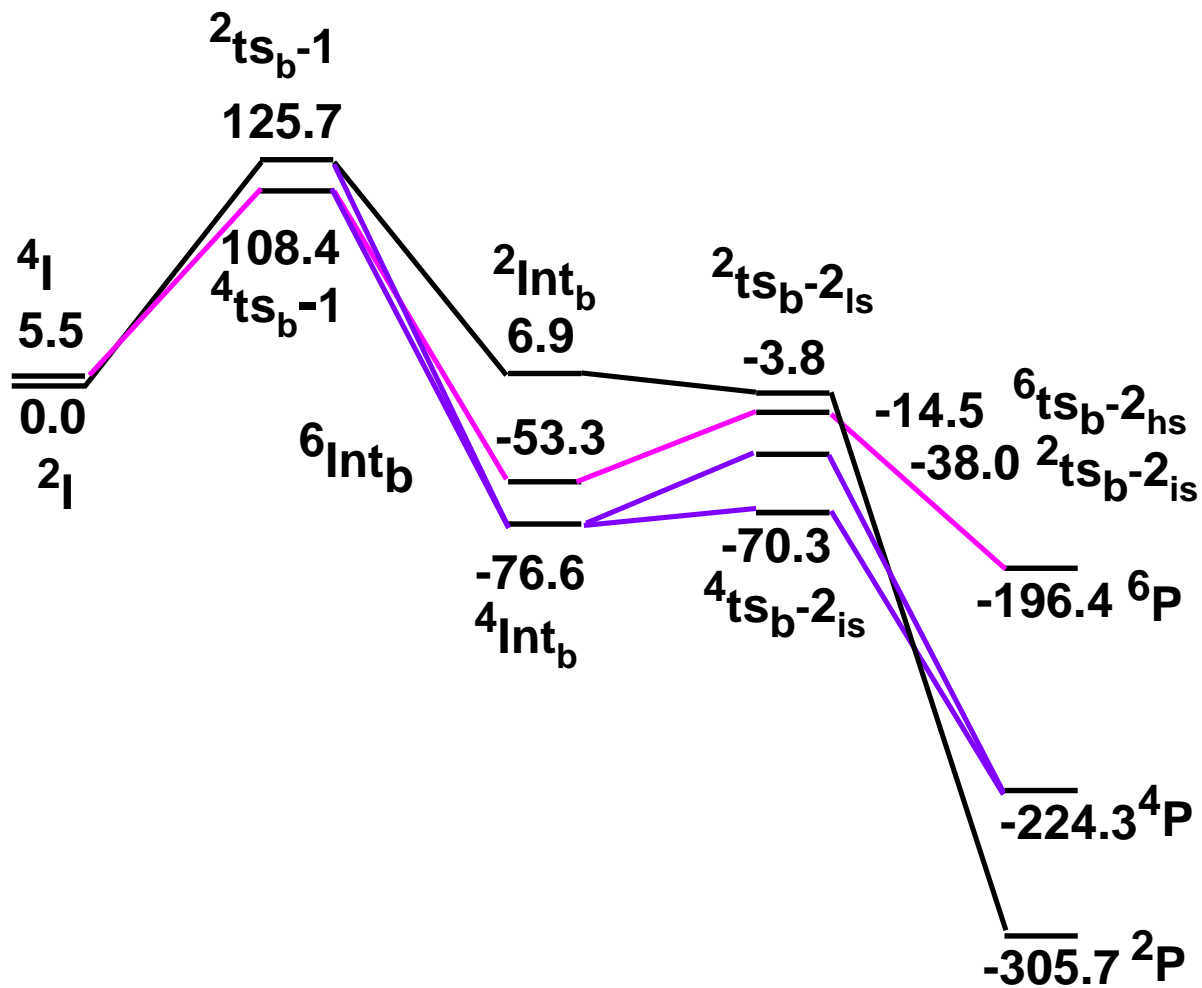

Fig. S9. B3LYP computed energy surface for the formation of cyclohex-2-enone from cyclohex-2-enol *via* C-H bond activation (**pathway b**) by Fe<sup>V</sup>=O species ( $\Delta G$  in kJmol<sup>-1</sup>).

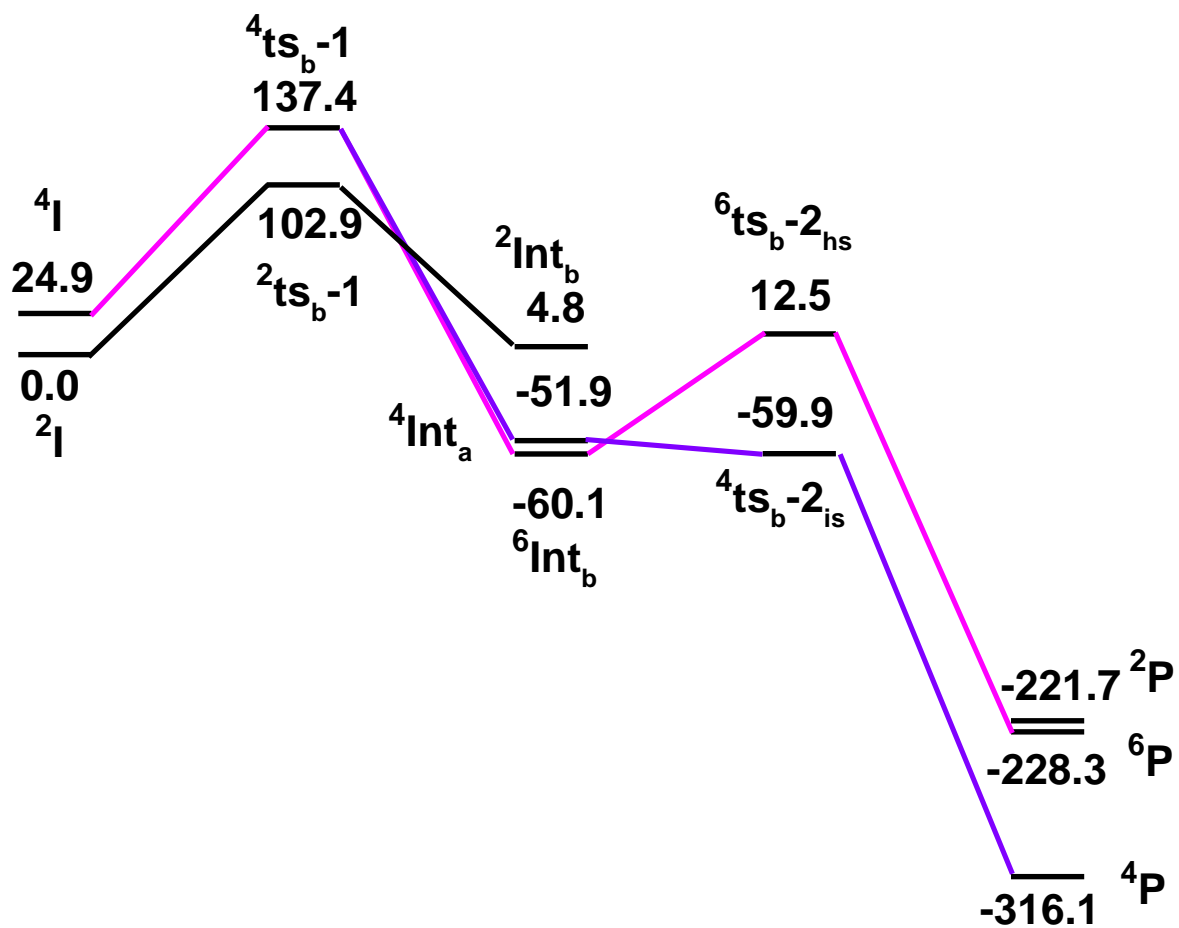

Fig. S10. wB97XD computed energy surface for the formation of cyclohex-2-enone from cyclohex-2-enol *via* C-H bond activation (**pathway b**) by Fe<sup>V</sup>=O species ( $\Delta G$  in kJmol<sup>-1</sup>).

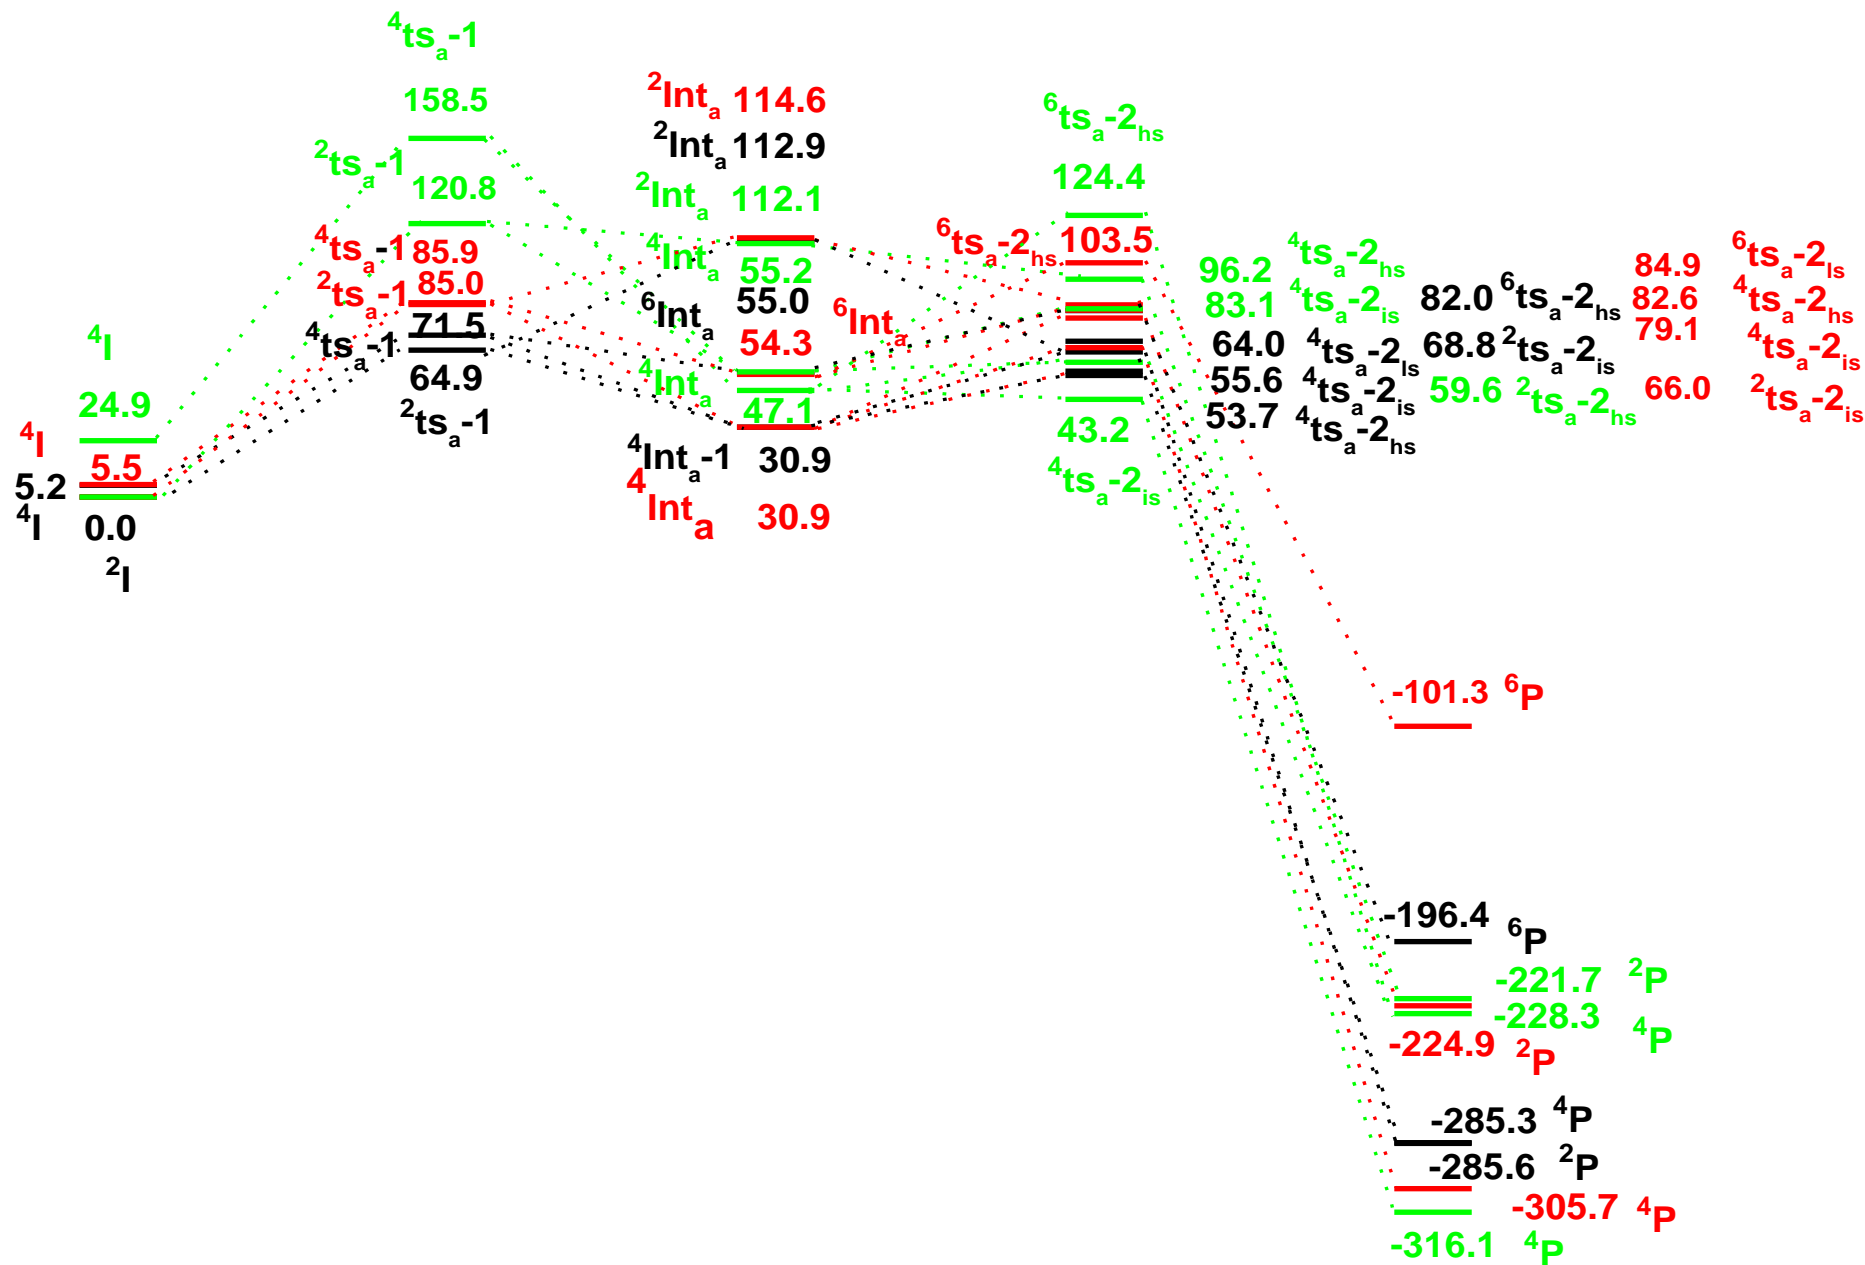

Fig. 11. B3LYP-D2 (black), B3LYP (red) and wB97XD (green) computed energy surface for the ground state of the *pathway a* ( $\Delta G$  in kJmol<sup>-1</sup>).

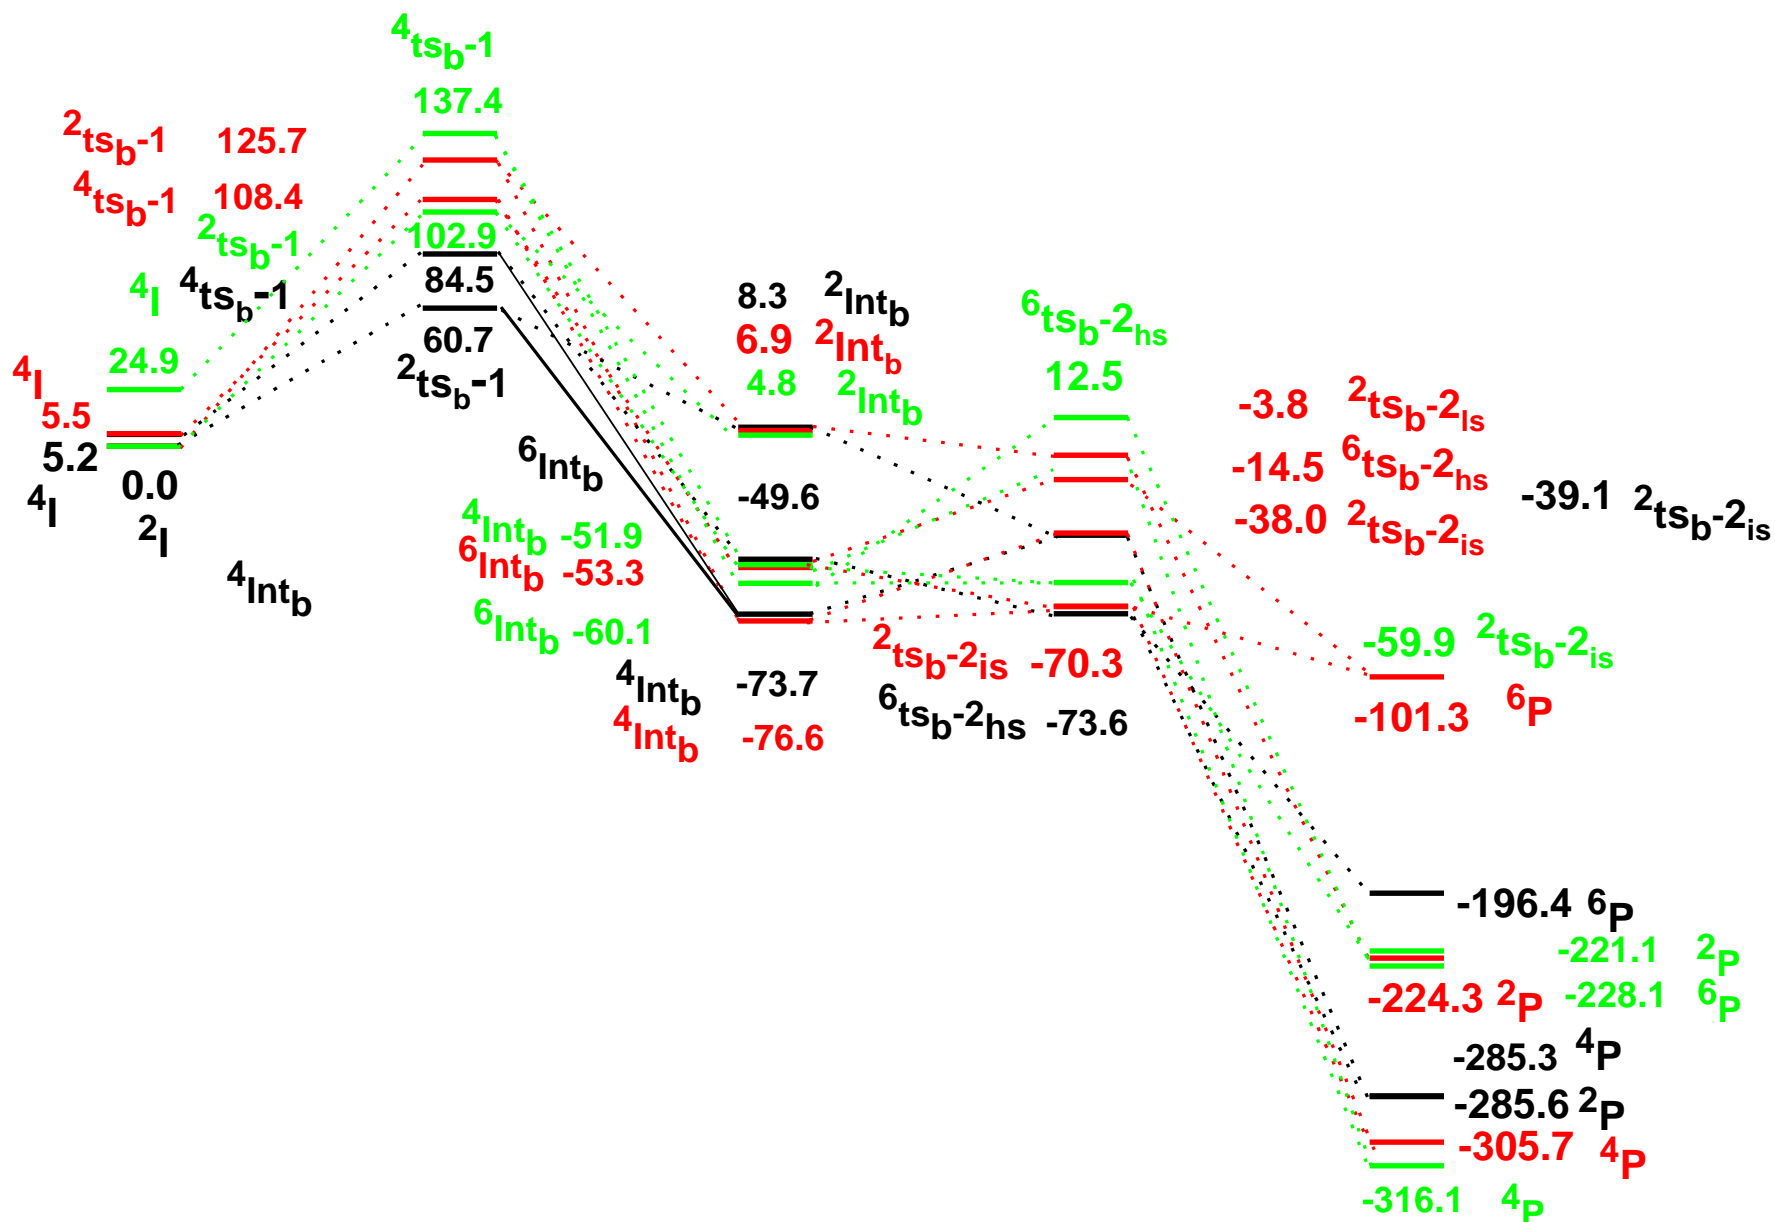

Fig. 12. B3LYP-D2 (black), B3LYP (red) and wB97XD (green) computed energy surface for the ground state of the *pathway b* ( $\Delta G$  in kJmol<sup>-1</sup>).

Full reference for reference number 27 of the main article

M. J. Frisch, G. W. Trucks, H. B. Schlegel, G. E. Scuseria, M. A. Robb, J. R. Cheeseman, G. Scalmani, V. Barone, B. Mennucci, G. A. Petersson, H. Nakatsuji, M. Caricato, X. Li, H. P. Hratchian, A. F. Izmaylov, J. Bloino, G. Zheng, J. L. Sonnenberg, M. Hada, M. Ehara, K. Toyota, R. Fukuda, J. Hasegawa, M. Ishida, T. Nakajima, Y. Honda, O. Kitao, H. Nakai, T. Vreven, J. A. Montgomery Jr., J. E. Peralta, F. Ogliaro, M. Bearpark, J. J. Heyd, E. Brothers, K. N. Kudin, V. N. Staroverov, R. Kobayashi, J. Normand, K. Raghavachari, A. Rendell, J. C. Burant, S. S. Iyengar, J. Tomasi, M. Cossi, N. Rega, J. M. Millam, M. Klene, J. E. Knox, J. B. Cross, V. Bakken, C. Adamo, J. Jaramillo, R. Gomperts, R. E. Stratmann, O. Yazyev, A. J. Austin, R. Cammi, C. Pomelli, J. W. Ochterski, R. L. Martin, K. Morokuma, V. G. Zakrzewski, G. A. Voth, P. Salvador, J. J. Dannenberg, S. Dapprich, A. D. Daniels, Ö. Farkas, J. B. Foresman, J. V. Ortiz, J. Cioslowski and D. J. Fox, GAUSSIAN 09 (Revision A.1), Gaussian, Inc., Wallingford, CT, 2009.

## Reference

1. F. T. de Oliveira, A. Chanda, D. Banerjee, X. Shan, S. Mondal, L. Que Jr., E. L. Bominaar, E. Munck and T. J. Collins, *Science*, 2007, **315**, 835-838.
